# Supplementary material for: STAT3 Potentiates SIAH-1 Mediated Proteasomal Degradation of β-Catenin in Human Embryonic Kidney Cells
Source: PubMed Central journal article supplement — Mol Cells. 2016 Nov 18;39(11):821–6. doi: 10.14348/molcells.2016.0212 (PMC5125938; doi:10.14348/molcells.2016.0212), 2016-11-18
Supplement: molce-39-11-821-supple.pdf [file molce-39-11-821-supple.pdf]

Supplementary Figure 1.

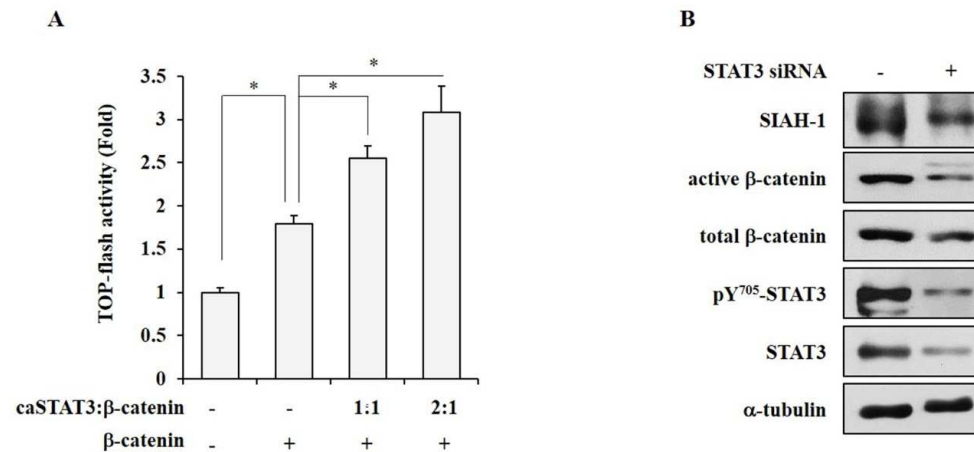

**Supplementary Figure 1. Positive correlation between STAT3 and β-catenin in breast cancer cells**

(A) MCF-7 cells, which are STAT3-inactivated breast cancer cells, were transfected with caSTAT3 and β-catenin. After 24 h of incubation, cells were subjected to a luciferase reporter assay. β-gal activity was used to normalize the transfection efficiency. Data are shown as the mean ± SD, \* $P < 0.01$ .

(B) MDA-MB231 cells, which are breast cancer cells that contain high levels of activated STAT3, were transfected with STAT3 siRNA (100 nM). After 24 h of transfection, cells were harvested, and the proteins were extracted in RIPA buffer for Western blotting.
